# Supplementary material for: Dynamic band alignment modulation of ultrathin WOx/ZnO stack for high on/off ratio field-effect switching applications
Source: Royal Society of Chemistry journal article supplement (doi:10.1039/c9nr10988a), 2020-01-01
Supplement: c9nr10988a1.pdf [file c9nr10988a1.pdf]

## Electronic Supporting Information

### **Dynamic band alignment modulation of ultrathin WO<sub>x</sub>/ZnO stack for high on/off ratio field-effect switching applications**

Ho-In Lee <sup>a</sup>, Jinseon Park <sup>b</sup>, Yun Ji Kim <sup>a</sup>, Sunwoo Heo <sup>a</sup>, Jeongwoon Hwang <sup>d</sup>, Seung-Mo Kim <sup>a</sup>, Yongsu Lee <sup>a</sup>, Kyeongjae Cho <sup>c</sup>, Myung Mo Sung <sup>\*b</sup>, and Byoung Hun Lee <sup>\*a</sup>

a. Center for Emerging Electronic Devices and Systems, School of Materials Science and Engineering, Gwangju Institute of Science and Technology, Cheomdangwagi-ro 123, Buk-gu, Gwangju 61005, South Korea, E-mail: [bhl@gist.ac.kr](mailto:bhl@gist.ac.kr)

b. Department of Chemistry, Hanyang University, Wangsimni-ro 222, Seongdong-gu, Seoul 04763, South Korea, E-mail: [smm@hanyang.ac.kr](mailto:smm@hanyang.ac.kr)

c. Department of Materials Science and Engineering, University of Texas at Dallas, 800 W Campbell road, Richardson, Texas 75080, USA.

d. Department of Physics Education, Chonnam National University, Yongbong-ro 77, Buk-gu, Gwangju 61186, South Korea.

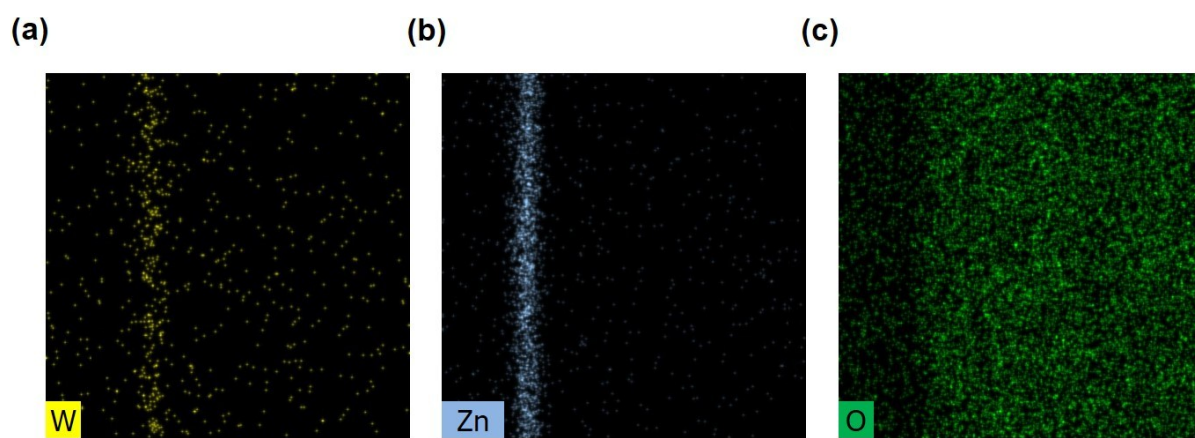

**Figure S1.** (a)-(c) EDS analysis of WO<sub>x</sub>/ZnO stacked structure (a) W (b) Zn (c) O.

(a)

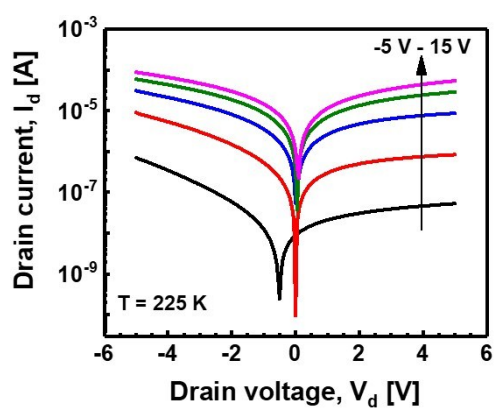

(b)

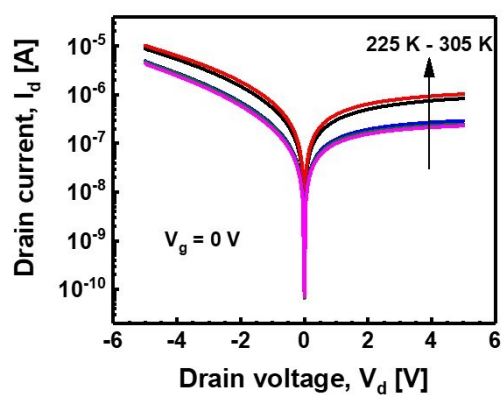

**Figure S2.** (a)-(b)  $I_d$ - $V_d$  characteristics of  $\text{WO}_x/\text{ZnO}$  FET. (a) Varying  $V_g$  from -5 V to 15 V at  $T = 225$  K. (b) Varying temperature from 225 K to 305 K at  $V_g = 0$  V.

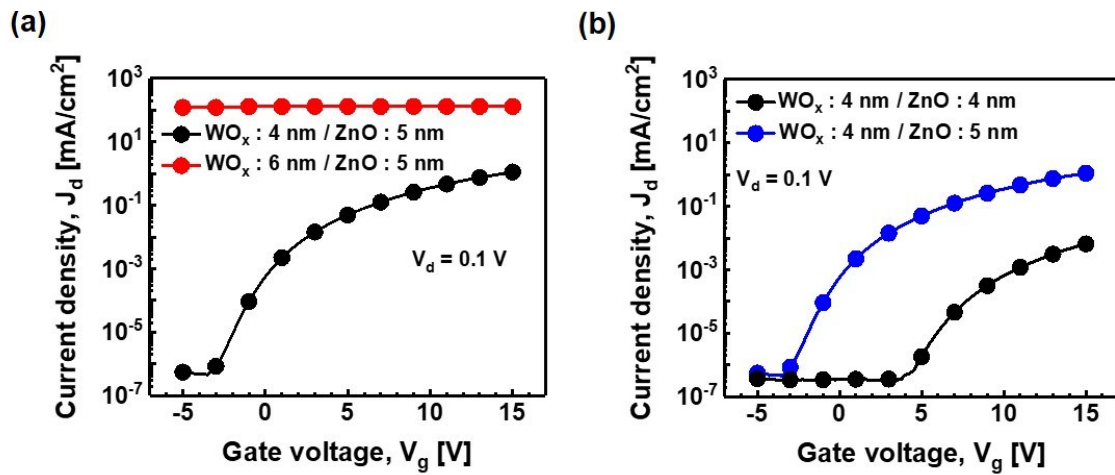

**Figure S3.**  $J_d$ - $V_g$  characteristics of  $WO_x/ZnO$  FET with different thickness of (a)  $WO_x$  and (b)  $ZnO$  measured at  $V_d = 0.1$  V.

When  $WO_x$  is 6 nm, metallic conduction was observed as shown in Figure S3 (a). On the other hand,  $WO_x$  is not uniform for the process condition targeting below 4 nm. Thus, somewhat narrow window around 4 nm was chosen to observe the unique conduction behavior.

In the similar way, the thickness below 5 nm  $ZnO$  showed deteriorated property as shown in Figure S3 (b). As a result, 5 nm was chosen to obtain a uniform conduction behavior at the thin film limit.

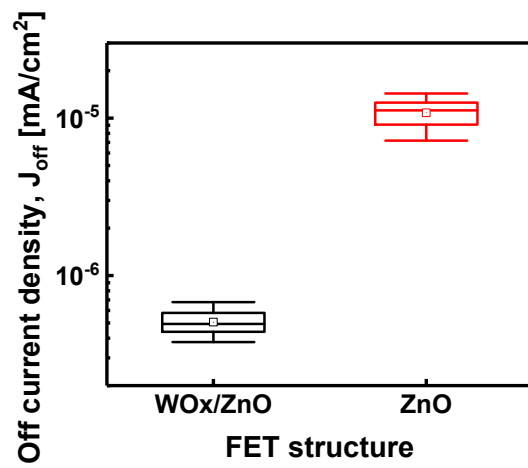

**Figure S4.** Static variations of off current density for overlapped  $\text{WO}_x/\text{ZnO}$  and  $\text{ZnO}$  FET. The eighteen devices for each of  $\text{WO}_x/\text{ZnO}$  and  $\text{ZnO}$  FET were measured.
